# Supplementary material
Source: Springer Nature journal article supplement (https://www.springermedizin.de/resource/supplementary/13045_2010_99_MOESM3_ESM.pdf/9660650)

# CD7 MSP

T-lineage

AML

CD7-

CD7+

CD7-

CD7+

H<sub>2</sub>O  
KARPAS-299

L-82

SR-786

ALL-SIL

CCRF-CEM

HPB-ALL

AP-1060

HL-60

OCI-M2

F-36P

GDM-1

SET-2

M-control

U-control

M-PCR

U-PCR

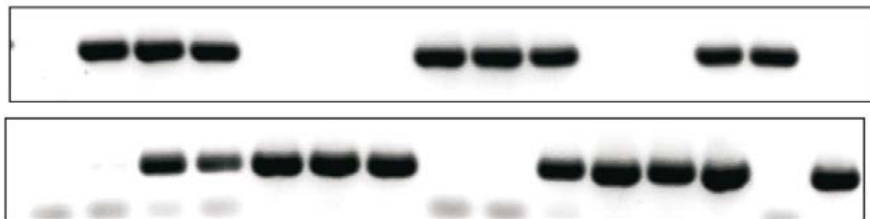

Supplement: MOESM3 [file 9660650]
